# Supplementary material
Source: PubMed Central journal article supplement (PMC3780795)
Supplement: NIHMS490181-supplement-SCD_Figure1.pdf [file NIHMS490181-supplement-SCD_Figure1.pdf]

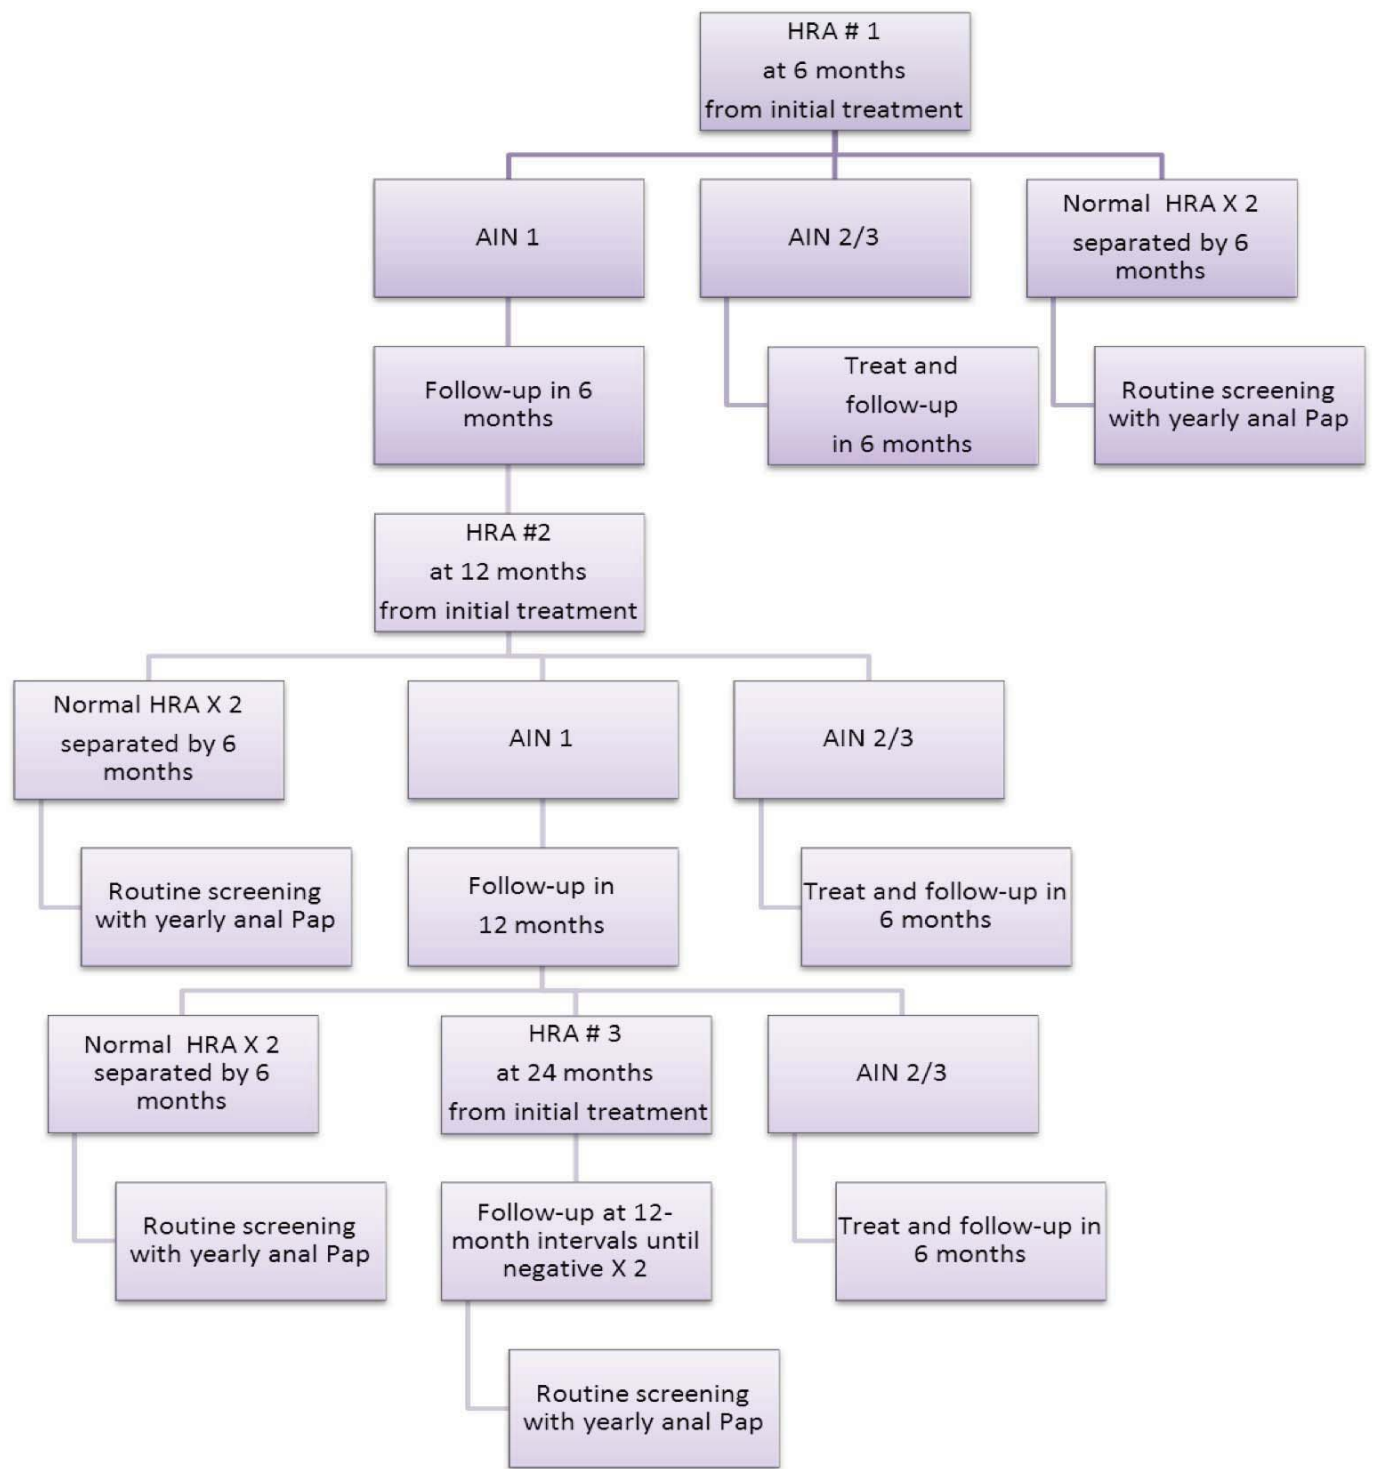

**Supplemental Digital Content Figure 1:** Decision pathway after treatment for high-grade anal dysplasia. HRA=high resolution anoscopy. AIN=anal intraepithelial neoplasia.
