# Supplementary material
Source: PubMed Central journal article supplement (PMC3780795)

Supplemental Digital Content Figure 2

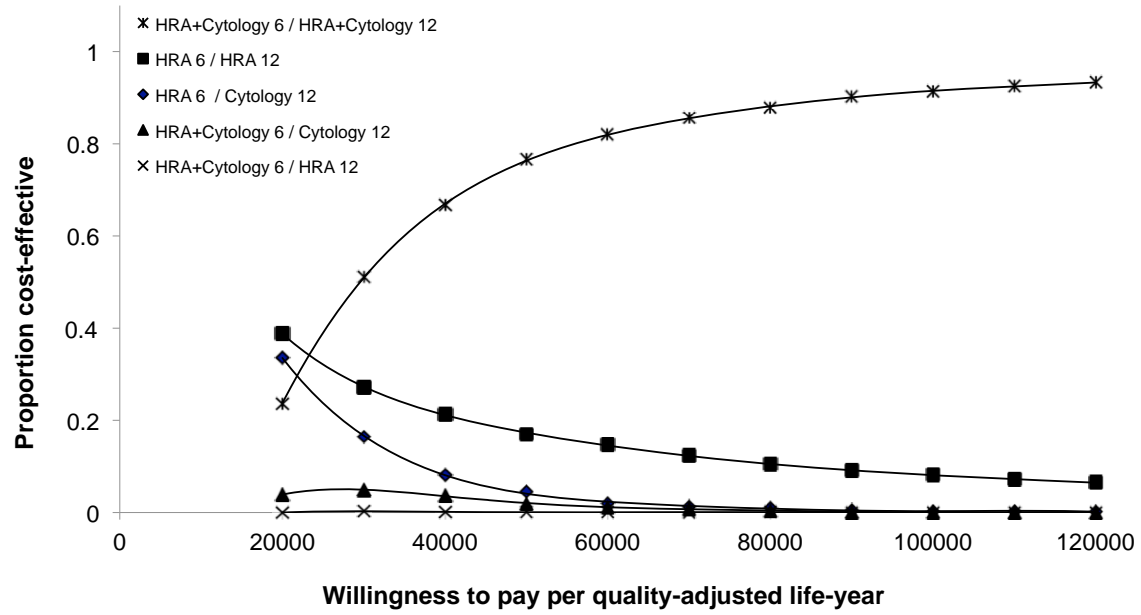

Supplement: NIHMS490181-supplement-SCD_Figure2.pdf [file NIHMS490181-supplement-SCD_Figure2.pdf]
